# Supplementary material
Source: publisher site journal article supplement (https://www.kjim.org/upload/media/kjim-2025-101-Supplementary-Table-2.pdf)
Supplement: Supplementary file 1 [file kjim-2025-101-Supplementary-Table-2.pdf]

**Supplementary Table 2. Internal consistency (Cronbach's alpha) between two PsAID-12 assessments**

|               | Cronbach's alpha | Std. alpha | Average | Alpha standard error | Mean  | SD    | Median |
|---------------|------------------|------------|---------|----------------------|-------|-------|--------|
| First survey  | 0.941            | 0.941      | 0.573   | 0.018                | 3.726 | 2.286 | 0.596  |
| Second survey | 0.951            | 0.951      | 0.620   | 0.015                | 3.468 | 2.167 | 0.590  |

PsAID-12, Psoriatic Arthritis Impact of Disease; SD, standard deviation.
